# Supplementary material for: Small-molecule inhibition of the METTL3/METTL14 complex suppresses neuroblastoma tumor growth and promotes differentiation
Source: PubMed Central journal article supplement (PMC11181463; doi:10.1016/j.celrep.2024.114165), 2024-04-30
Supplement: NIHMS2000776-supplement-1.pdf [file NIHMS2000776-supplement-1.pdf]

**Supplemental information**

**Small-molecule inhibition of the METTL3/METTL14  
complex suppresses neuroblastoma tumor  
growth and promotes differentiation**

**Monica Pomaville, Mohansrinivas Chennakesavalu, Pingluan Wang, Zhiwei Jiang, Hui-Lung Sun, Peizhe Ren, Ryan Borchert, Varsha Gupta, Chang Ye, Ruiqi Ge, Zhongyu Zhu, Mallory Brodnik, Yuhao Zhong, Kelley Moore, Helen Salwen, Rani E. George, Malgorzata Krajewska, Alexandre Chlenski, Mark A. Applebaum, Chuan He, and Susan L. Cohn**

## Supplemental Figures

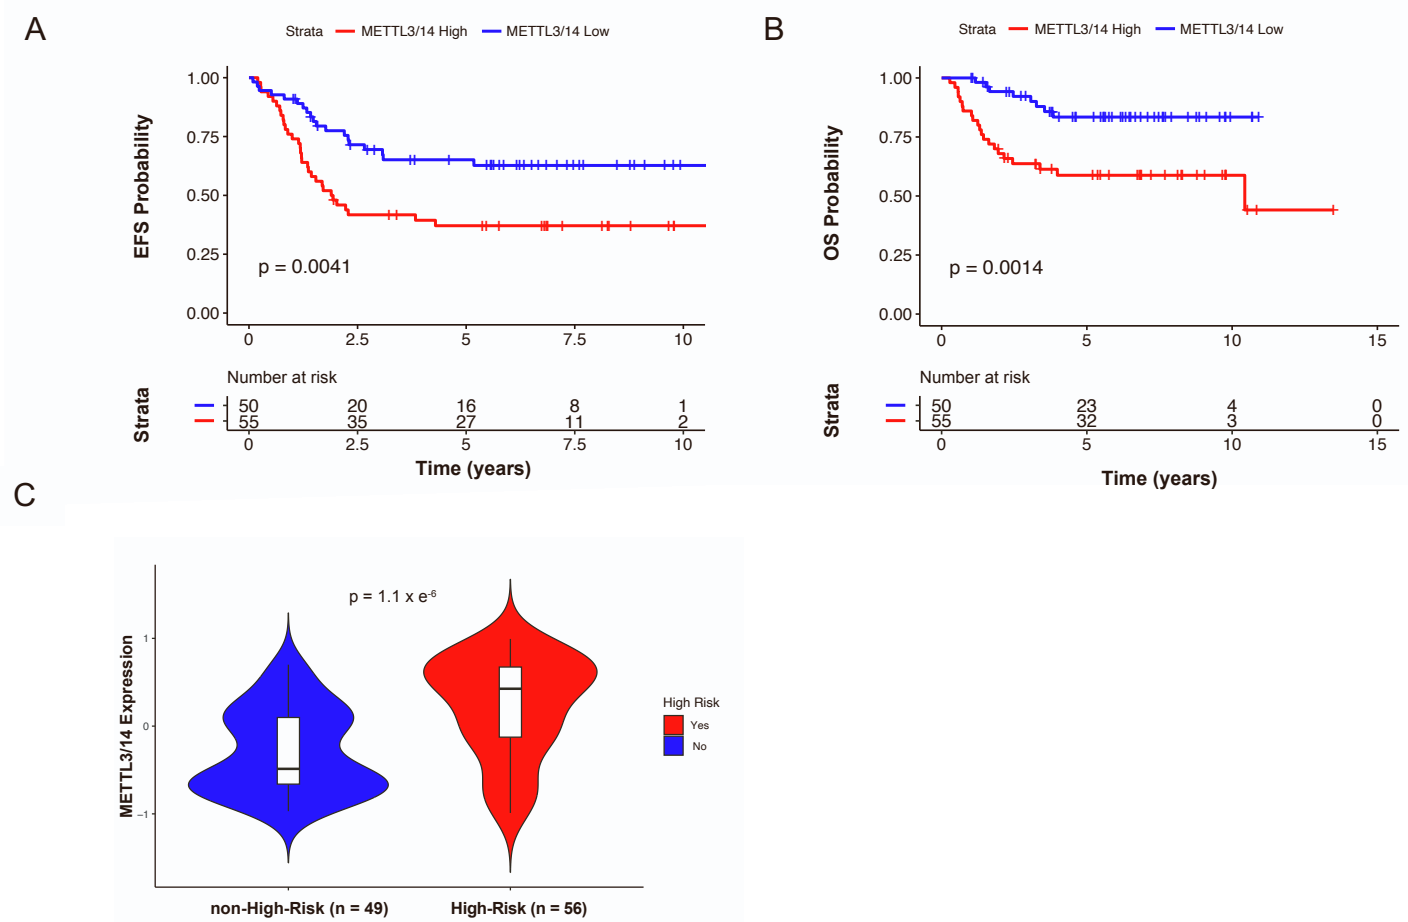

**Figure S1. METTL3/METTL14 expression correlates with survival in patients with neuroblastoma.** (A) Kaplan Meier survival curve showing event-free survival of patients with neuroblastoma in the Westermann cohort (n=105) according to METTL3/METTL14 expression. (B) Kaplan Meier survival curve showing overall survival of patients with neuroblastoma in the Westermann cohort (n=105) according to METTL3/METTL14 expression. (C) Violin plot showing relative distribution of METTL3/METTL14 expression in patients in the Westermann cohort classified as having high-risk (n=56) or non-high-risk (n=49) neuroblastoma.

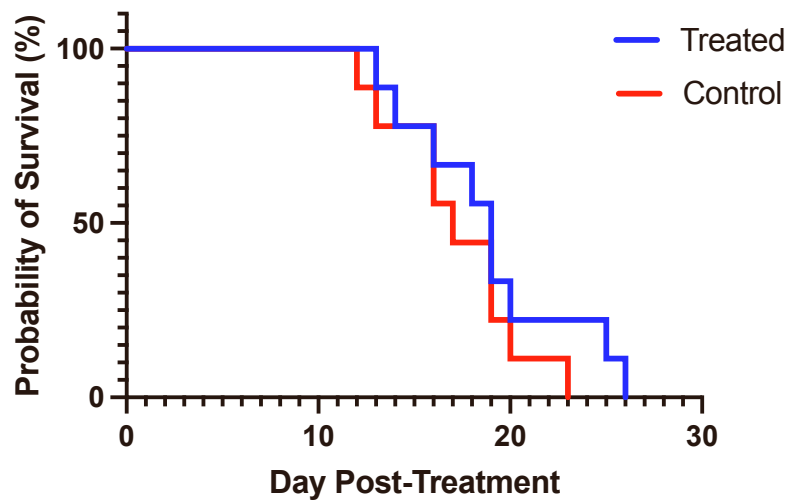

**Figure S2. Effect of METTL3/14 inhibition in neuroblastoma xenografts derived from NGP cells.** Overall survival of mice with neuroblastoma xenografts derived from NGP cells treated with STM2457 versus vehicle control is not significantly different ( $p=0.3138$ ).

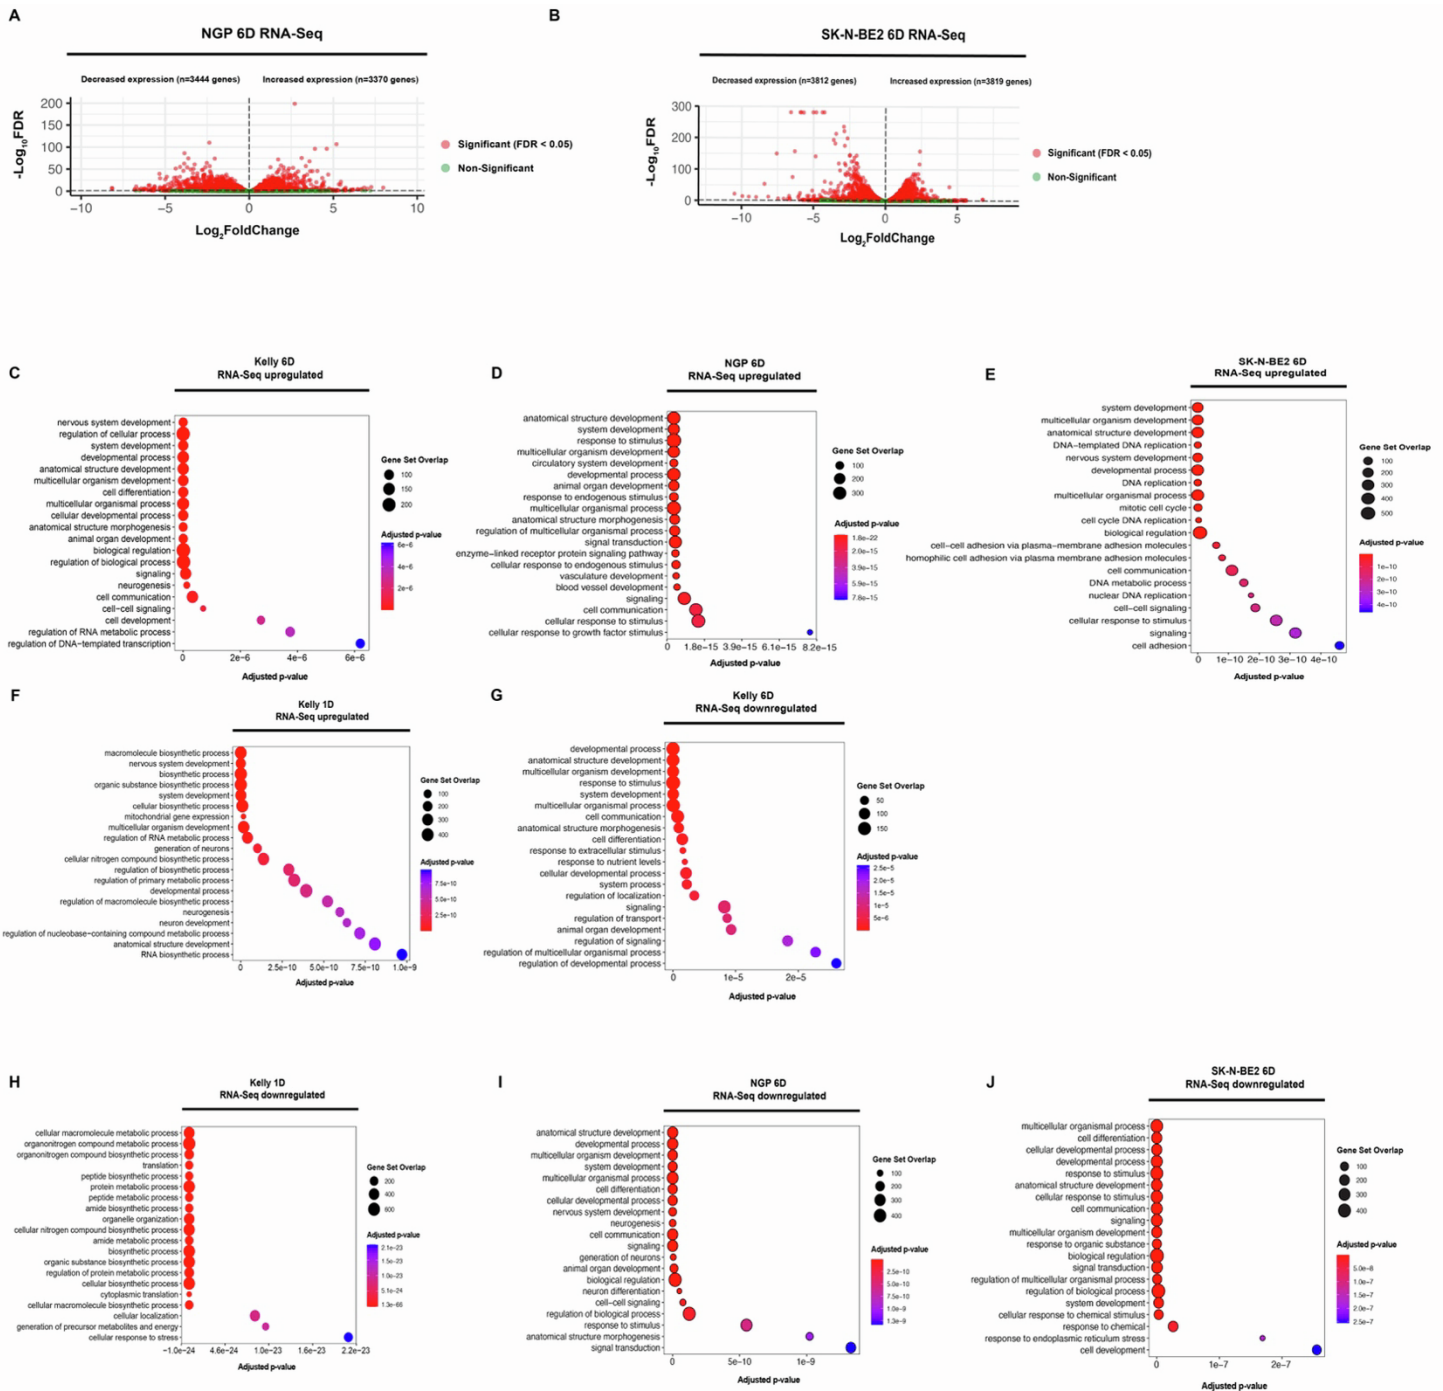

**Figure S3. STM2457 treatment increases expression of neuronal differentiation genes.** (A) Volcano plot showing differentially expressed genes in NGP cells treated for 6 days with 1  $\mu$ M STM2457. (B) Volcano plot showing differentially expressed genes in SK-N-BE2 cells treated for 6 days with 12  $\mu$ M STM2457. (C) GO pathway analysis showing up-regulated gene pathways in Kelly cells, (D) NGP cells, and (E) SK-N-BE2 cells after 6 days of treatment with STM2457 (8  $\mu$ M, 1  $\mu$ M, and 12  $\mu$ M, respectively). (F) GO pathway analysis showing up-regulated gene pathways in Kelly cells treated with 8  $\mu$ M STM2457 for 1 day. (G) GO pathway analysis showing down-regulated gene pathways in Kelly cells treated with 8  $\mu$ M STM2457 for 6 days, (H) Kelly cells treated with 8  $\mu$ M for 1 day, (I) NGP cells treated with 1  $\mu$ M STM2457 for 6 days, and (J) SK-N-BE2 cells treated with 12  $\mu$ M STM2457 for 6 days.

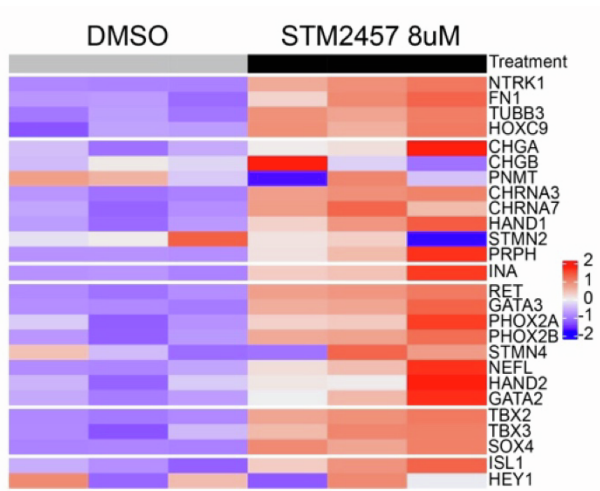

**Figure S4. STM2457 treatment promotes expression of selected differentiation genes.** Heat map of expression (z scored expression) of a previously defined set of neuronal differentiation genes (Supplementary Table 1) in Kelly cells treated with DMSO or 8  $\mu$ M STM2457 for six days.

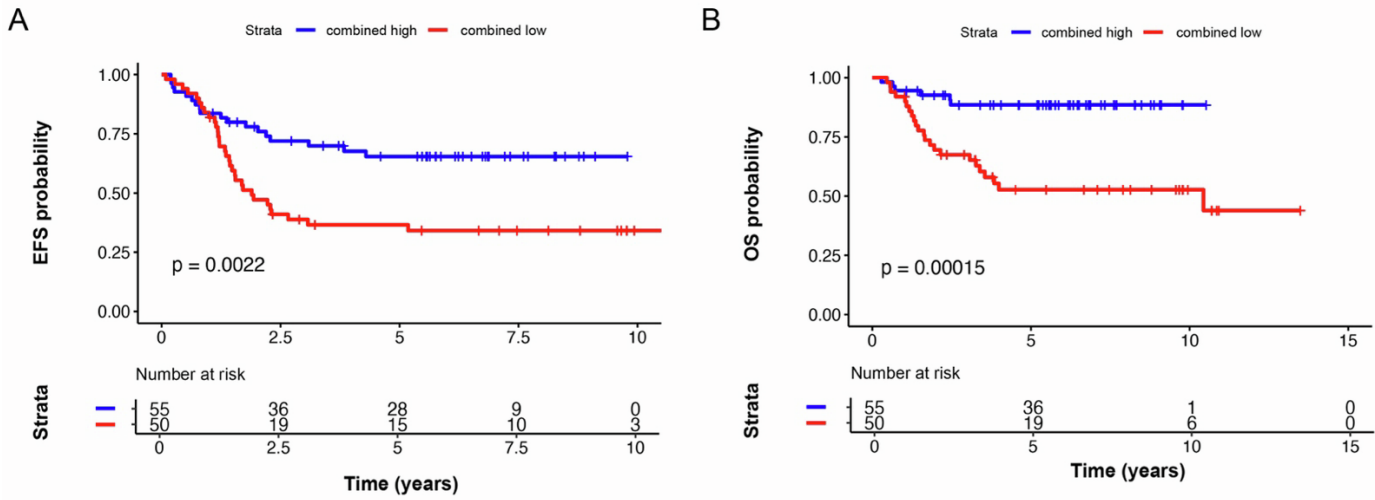

**Figure S5. High METTL3/14 inhibitor response signature scores are correlated with improved survival in neuroblastoma. (A)** Event-free survival and **(B)** overall survival is significantly improved for patients in the Westermann cohort with high expression of STM2457 targets (n=55) compared to those with low expression (n=50) ( $p=0.0022$  and  $p=0.00015$ , respectively). STM2457 targets were defined from the 73 genes in the nervous system development pathway (GO:0007399) that are found up-regulated in NGP, Kelly, and SK-N-BE2 cells after treatment with STM2457 for 6 days (1  $\mu\text{M}$ , 8  $\mu\text{M}$ , and 12  $\mu\text{M}$ , respectively).

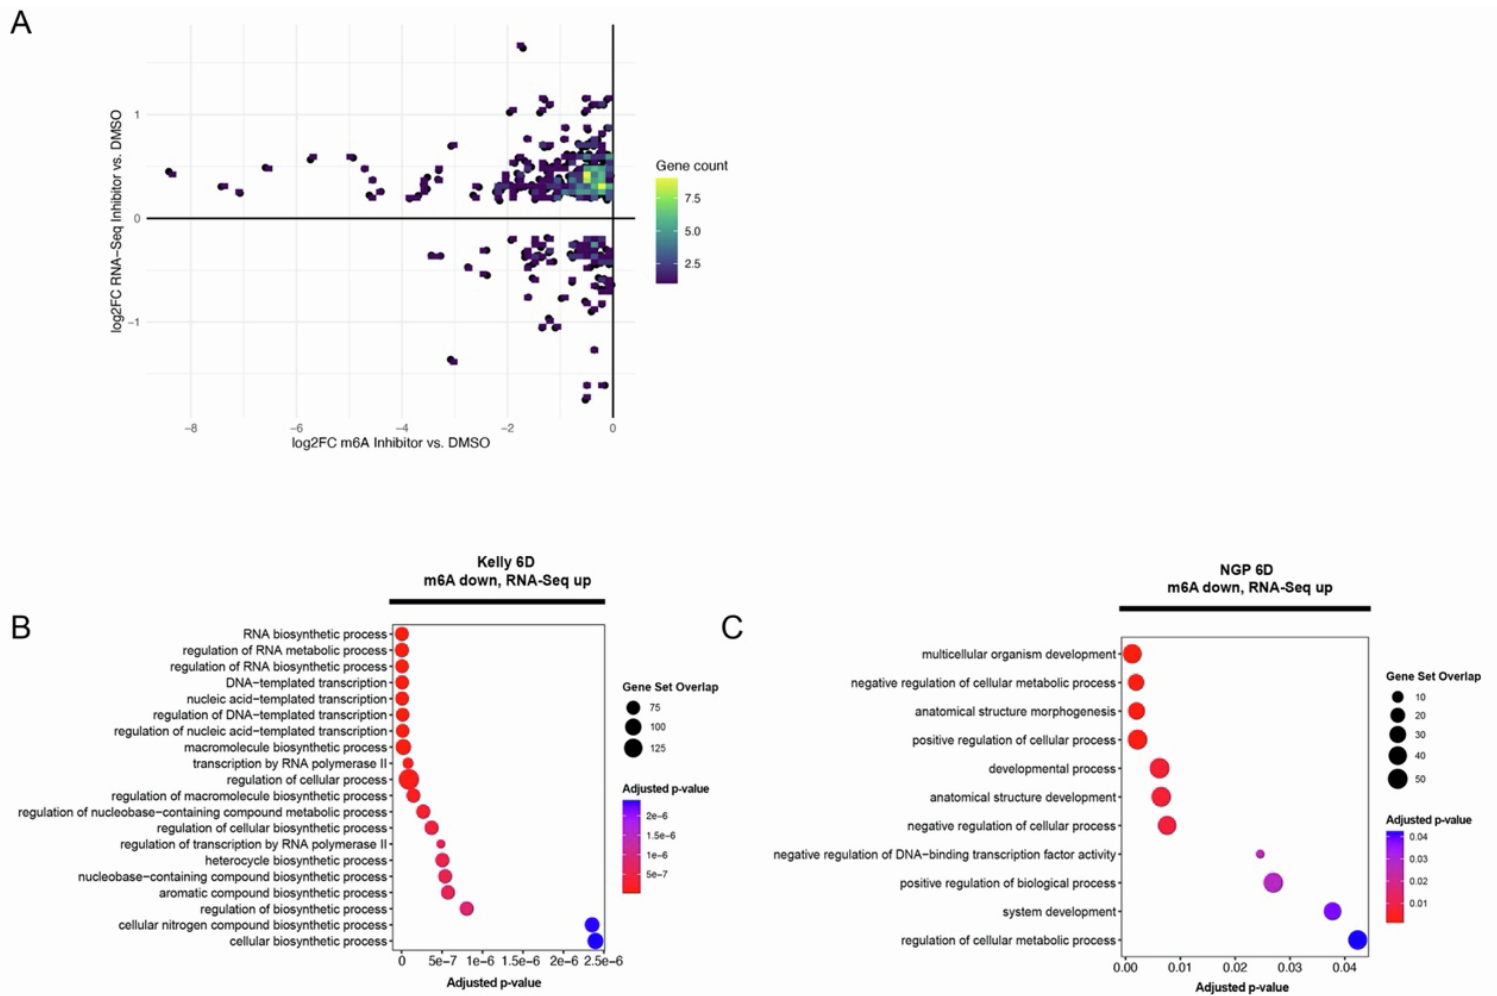

**Figure S6. STM2457 treatment decreases m<sup>6</sup>A mRNA deposition and increases mRNA expression in networks enriched for neuronal differentiation.** (A) STM2457 treatment of Kelly cells for 6 days promotes loss of mRNA m<sup>6</sup>A deposition (x axis) assessed by meRIP sequencing and increased gene expression assessed by RNA sequencing (y axis) compared to DMSO. (B) GO analysis of upregulated METTL3 targets following treatment with 8 $\mu$ M STM2457 for 6 days in Kelly cells and in (C) NGP cells.

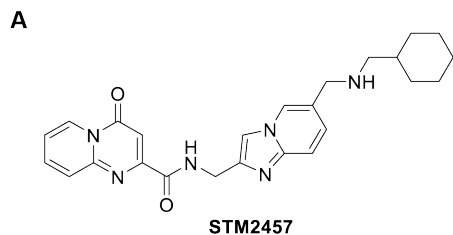

**B**  $^1\text{H NMR}$  (400 MHz, DMSO)  $\delta$  9.16 (t,  $J = 6.0$  Hz, 1H), 9.02 (dd,  $J = 7.1, 2.1$  Hz, 1H), 8.40 (s, 1H), 8.08 (ddd,  $J = 8.6, 5.3, 1.7$  Hz, 1H), 7.80 (d,  $J = 8.2$  Hz, 1H), 7.50 – 7.42 (m, 2H), 7.23 (dd,  $J = 9.2, 1.8$  Hz, 1H), 6.90 (s, 1H), 4.61 (d,  $J = 6.0$  Hz, 2H), 3.70 (s, 2H), 2.36 (d,  $J = 6.8$  Hz, 2H), 1.73 (dd,  $J = 12.9, 2.6$  Hz, 2H), 1.68 – 1.56 (m, 3H), 1.41 (t,  $J = 7.0$  Hz, 1H), 1.22 – 1.05 (m, 3H), 0.89 – 0.83 (m, 2H).  $^{13}\text{C NMR}$  (101 MHz, DMSO)  $\delta$  162.89, 157.92, 153.67, 150.49, 144.14, 143.46, 138.54, 128.50, 127.43, 126.70, 126.20, 117.33, 116.43, 116.05, 110.85, 100.81, 52.14, 47.95, 37.53, 34.45, 29.93, 25.52, 25.01. HRMS  $\text{C}_{25}\text{H}_{29}\text{N}_6\text{O}_2 + [\text{M} + \text{H}]^+$  calculated 445.2347, found 445.2353.

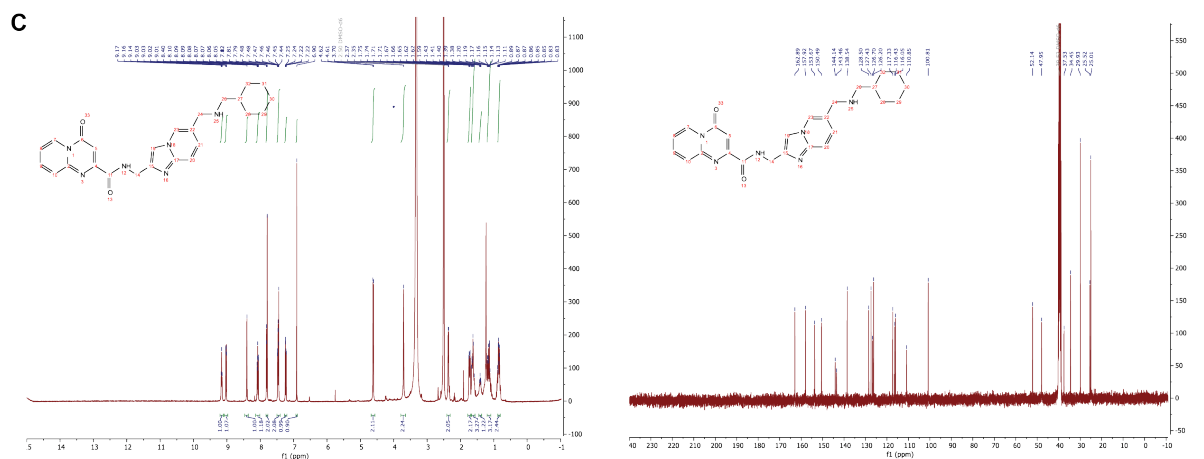

**Figure S7. The METTL3/14 inhibitor STM2457 was synthesized and validated. (A) Structure of METTL3/METTL14 inhibitor, STM2457. (B) Molecular identification based on Nuclear Magnetic Resonance (NMR) analysis. (C) NMR analysis.**



| Gene Name | Classification 1              | Citation 1        | Classification 2            | Citation 2       |
|-----------|-------------------------------|-------------------|-----------------------------|------------------|
| STMN2     | Chromaffin                    | Bedoya-Reina [1]  |                             |                  |
| CHGA      | Chromaffin                    | Bedoya-Reina [1]  | Adrenergic                  | Bedoya-Reina [1] |
| CHGB      | Chromaffin                    | Bedoya-Reina [1]  | Adrenergic                  | Bedoya-Reina [1] |
| HAND1     | Chromaffin                    | Bedoya-Reina [1]  |                             |                  |
| PNMT      | Chromaffin                    | Bedoya-Reina [1]  | Adrenergic                  | Bedoya-Reina [1] |
| CHRNA3    | Chromaffin                    | Bedoya-Reina [1]  |                             |                  |
| NTRK1     | Differentiation               | Nakagawara [2]    | Adrenergic                  | Bedoya-Reina [1] |
| TUBB3     | Differentiation               | Zimmerman [3]     |                             |                  |
| HOXC9     | Differentiation               | Mao [4]           |                             |                  |
| FN1       | Differentiation               | Zimmerman [3]     |                             |                  |
| INA       | Central Nervous System        | Kildisiute [6]    | Fetal Medullary             | Kildisiute [6]   |
| RET       | Sympathoadrenal development   | Bedoya-Reina [1]  |                             |                  |
| STMN4     | Sympathoadrenal development   | Bedoya-Reina [1]  |                             |                  |
| NEFL      | Sympathoadrenal development   | Bedoya-Reina [1]  |                             |                  |
| HAND2     | Sympathoadrenal development   | Tomolonis [7]     |                             |                  |
| GATA3     | Sympathoadrenal development   | Tomolonis [7]     |                             |                  |
| PHOX2A    | Adrenergic                    | Bedoya-Reina [1]  | Sympathoadrenal development | Tomolonis [7]    |
| PHOX2B    | Adrenergic                    | Bedoya-Reina [1]  | Sympathoadrenal development | Tomolonis [7]    |
| GATA2     | Sympathoadrenal development   | Tomolonis [7]     |                             |                  |
| SOX4      | Retino-sympathetic            | Zimmerman [3]     |                             |                  |
| TBX2      | Retino-sympathetic            | Zimmerman [3]     |                             |                  |
| TBX3      | Retino-sympathetic            | Zimmerman [3]     | Fetal Medullary             | Kildisiute [6]   |
| PRPH      | Sympathoblast                 | Bedoya-Reina [1]  | Chromaffin                  | Bedoya-Reina [1] |
| HEY1      | Adrenergic-type neuroblastoma | Van Groningen [5] |                             |                  |
| CHRNA7    | Progenitor                    | Bedoya-Reina [1]  | Chromaffin                  | Bedoya-Reina [1] |
| ISL1      | Adrenergic                    | Bedoya-Reina [1]  |                             |                  |

**Table S1.** List of differentiation-associated genes compiled from RNA sequencing in Kelly cells and literature search.

| Shared upregulated genes between Kelly, NGP, and SK-N-BE2 cells within the nervous system development pathway (GO:0007399) |         |         |       |
|----------------------------------------------------------------------------------------------------------------------------|---------|---------|-------|
| GFRA2                                                                                                                      | APBA2   | LLGL1   | KIF14 |
| PLPPR4                                                                                                                     | CDKN2C  | NR0B1   |       |
| PLXNA4                                                                                                                     | ATP7A   | CTNNB1  |       |
| TMEM108                                                                                                                    | SFRP1   | KDM2B   |       |
| DOK4                                                                                                                       | TBX3    | EDNRA   |       |
| CNP                                                                                                                        | MAP4K4  | EHMT2   |       |
| GPRIN1                                                                                                                     | OGDH    | MEIS1   |       |
| MARCKSL1                                                                                                                   | LRRN3   | B4GALT5 |       |
| NES                                                                                                                        | DCHS1   | PTPRS   |       |
| CHRM1                                                                                                                      | TUBB2B  | MAP1A   |       |
| TENM4                                                                                                                      | GLI2    | LPAR1   |       |
| PLPPR5                                                                                                                     | NREP    | RTN1    |       |
| XRCC2                                                                                                                      | SDC2    | ATXN1   |       |
| SULF2                                                                                                                      | DAG1    | PBX1    |       |
| MMP2                                                                                                                       | DLC1    | TEAD2   |       |
| GRIP1                                                                                                                      | SYNE2   | SMARCC2 |       |
| MDGA1                                                                                                                      | FN1     | CHRNA7  |       |
| EVL                                                                                                                        | SPTBN1  | CCDC14  |       |
| ACTB                                                                                                                       | TIAM1   | PKD2    |       |
| GDF11                                                                                                                      | BASP1   | GPR173  |       |
| MACF1                                                                                                                      | ENC1    | MTR     |       |
| SPG7                                                                                                                       | COL4A1  | DCX     |       |
| ST8SIA2                                                                                                                    | PHACTR4 | DPYSL2  |       |
| IGF1R                                                                                                                      | IGSF9   | ZEB2    |       |

**Table S2.** List of genes up-regulated in Kelly, NGP, and SK-N-BE2 cells after treatment with STM2457 (8  $\mu$ M, 1  $\mu$ M, 12  $\mu$ M, respectively) and list of genes up-regulated in Kelly, NGP, and SK-N-BE2 cells after treatment with STM2457 (8  $\mu$ M, 1  $\mu$ M, 12  $\mu$ M, respectively) classified as part of the nervous system development pathway (GO:0007399).

| <b>Genes upregulated in STM2457-treated tumors relative to vehicle control after 14 consecutive days of treatment and followed to 23 days of life.</b> |         |            |         |        |
|--------------------------------------------------------------------------------------------------------------------------------------------------------|---------|------------|---------|--------|
| HSPA1A                                                                                                                                                 | SEC61A1 | DPP7       | RPL23   | RPS14  |
| NR4A1                                                                                                                                                  | RPL13   | LIMD2      | BSG     | FLNA   |
| MT-CYB                                                                                                                                                 | RTL1    | SRRM3      | GPS1    | NUCB1  |
| HSPB1                                                                                                                                                  | INTS11  | TRMT1      | TELO2   | PNKP   |
| RPL36                                                                                                                                                  | FBRSL1  | DPP9       | DLGAP4  | RPS8   |
| MDK                                                                                                                                                    | EEF1A2  | UBA52      | FAM207A | STRA6  |
| GAPDH                                                                                                                                                  | SP100   | RPL10      | ZNF316  | ZDHHC8 |
| RPS11                                                                                                                                                  | NOP56   | MT-CO3     | WDR74   | CC2D1A |
| MT-ND5                                                                                                                                                 | CEP131  | FAM193B    | CHTF18  | RPL35  |
| RPS19                                                                                                                                                  | CRH     | RRP12      | DOK4    | NPDC1  |
| SEZ6L2                                                                                                                                                 | MT-ND6  | GADD45GIP1 | IGFBP2  | RPL32  |
| RPL28                                                                                                                                                  | ELOB    | MT-CO2     | DNAJB1  | TTC9B  |
| MT-ND4L                                                                                                                                                | SERF2   | KLHL17     | PPP6R1  |        |
| CHGA                                                                                                                                                   | SNRNP70 | IGSF9      | GATA2   |        |
| ACIN1                                                                                                                                                  | RPL19   | PSMC3      | IER5L   |        |
| JUN                                                                                                                                                    | COL6A1  | CDC37      | RPS24   |        |
| HSPA1B                                                                                                                                                 | MAP1B   | RPL37      | ARFGAP1 |        |
| TBX2                                                                                                                                                   | RABL6   | IER2       | PDZD4   |        |
| MT-ND3                                                                                                                                                 | RPL8    | HEXD       | SF3A2   |        |
| COL6A2                                                                                                                                                 | NOP58   | MFSD12     | RPL4    |        |
| RPS27                                                                                                                                                  | H1-10   | RPLP1      | KRT17   |        |
| PTMS                                                                                                                                                   | PELP1   | AHCY       | PPDPF   |        |
| MT-ND4                                                                                                                                                 | RPL18   | TNFRSF25   | SCRIB   |        |
| CCNL2                                                                                                                                                  | SAMD1   | RPL29      | TPM2    |        |
| LRRC4B                                                                                                                                                 | PRRT2   | ANKRD13B   | GDPD5   |        |

**Table S3.** Genes up-regulated in STM2457-treated tumors (50mg/kg/dose) derived from Kelly cells relative to vehicle control after 14 consecutive days of treatment and followed to 23 days of life.

| <b>Shared genes that are upregulated, contain lower m<sup>6</sup>A, and have increased half-life in Kelly cells treated with METTL3/14 inhibitor</b> |          |
|------------------------------------------------------------------------------------------------------------------------------------------------------|----------|
| ABHD8                                                                                                                                                | KIF26A   |
| ADRA2A                                                                                                                                               | KIF3C    |
| ALDH1B1                                                                                                                                              | MARVELD1 |
| APC2                                                                                                                                                 | MEX3D    |
| ARID1A                                                                                                                                               | MPST     |
| B3GALT6                                                                                                                                              | NEU4     |
| BRPF3                                                                                                                                                | P3H4     |
| C11orf95                                                                                                                                             | PATZ1    |
| CHST2                                                                                                                                                | PCDH1    |
| CKAP4                                                                                                                                                | PLEKHO1  |
| DDN                                                                                                                                                  | PPP1R18  |
| DDX17                                                                                                                                                | RBM15B   |
| DOK4                                                                                                                                                 | RHOB     |
| FAM171A2                                                                                                                                             | SBK1     |
| FBXO41                                                                                                                                               | SLC10A4  |
| FEM1A                                                                                                                                                | SLIT3    |
| FEN1                                                                                                                                                 | SOX12    |
| FLAD1                                                                                                                                                | SOX4     |
| FSCN1                                                                                                                                                | TBX2     |
| GPRIN1                                                                                                                                               | TNRC18   |
| HCFC1                                                                                                                                                | TRIB2    |
| HNRNPF                                                                                                                                               | UBTF     |
| HOXC9                                                                                                                                                | ZNF48    |
| JARID2                                                                                                                                               | ZNF581   |
| KIF18B                                                                                                                                               | ZNF787   |

**Table S4.** List of genes assessed by RNA sequencing in Kelly cells after treatment with 8  $\mu$ M STM2457 that show increased expression, decreased m<sup>6</sup>A, and increased stability after 6 days of treatment.

| Primer sequences used |   |                         |  |  |
|-----------------------|---|-------------------------|--|--|
| Actin                 | F | CACCATTGGCAATGAGCGGTTC  |  |  |
| Actin                 | R | AGGTCTTTGCGGATGTCCACGT  |  |  |
| CHGA                  | F | GGTTCTTGAGAACCAGAGCAGC  |  |  |
| CHGA                  | R | GCTTCACCACTTTTCTCTGCCTC |  |  |
| NTRK1                 | F | CACTAACAGCACATCTGGAGACC |  |  |
| NTRK1                 | R | TGAGCACAAGGAGCAGCGTAGA  |  |  |

**Table S5.** Primer sequences used in this study.

## Supplemental reference list <sup>1-7</sup>

1. Bedoya-Reina, O.C., Li, W., Arceo, M., Plescher, M., Bullova, P., Pui, H., Kaucka, M., Kharchenko, P., Martinsson, T., Holmberg, J., et al. (2021). Single-nuclei transcriptomes from human adrenal gland reveal distinct cellular identities of low and high-risk neuroblastoma tumors. *Nat Commun* 12, 5309. 10.1038/s41467-021-24870-7.
2. Nakagawara, A., Arima-Nakagawara, M., Scavarda, N.J., Azar, C.G., Cantor, A.B., and Brodeur, G.M. (1993). Association between high levels of expression of the TRK gene and favorable outcome in human neuroblastoma. *N Engl J Med* 328, 847-854. 10.1056/NEJM199303253281205.
3. Zimmerman, M.W., Durbin, A.D., He, S., Oppel, F., Shi, H., Tao, T., Li, Z., Berezovskaya, A., Liu, Y., Zhang, J., et al. (2021). Retinoic acid rewires the adrenergic core regulatory circuitry of childhood neuroblastoma. *Sci Adv* 7, eabe0834. 10.1126/sciadv.abe0834.
4. Mao, L., Ding, J., Zha, Y., Yang, L., McCarthy, B.A., King, W., Cui, H., and Ding, H.F. (2011). HOXC9 links cell-cycle exit and neuronal differentiation and is a prognostic marker in neuroblastoma. *Cancer Res* 71, 4314-4324. 10.1158/0008-5472.CAN-11-0051.
5. van Groningen, T., Koster, J., Valentijn, L.J., Zwijnenburg, D.A., Akogul, N., Hasselt, N.E., Broekmans, M., Haneveld, F., Nowakowska, N.E., Bras, J., et al. (2017). Neuroblastoma is composed of two super-enhancer-associated differentiation states. *Nat Genet* 49, 1261-1266. 10.1038/ng.3899.
6. Kildisiute, G., Kholosy, W.M., Young, M.D., Roberts, K., Elmentaite, R., van Hooff, S.R., Pacyna, C.N., Khabirova, E., Piapi, A., Thevanesan, C., et al. (2021). Tumor to normal single-cell mRNA comparisons reveal a pan-neuroblastoma cancer cell. *Sci Adv* 7. 10.1126/sciadv.abd3311.
7. Tomolonis, J.A., Agarwal, S., and Shohet, J.M. (2018). Neuroblastoma pathogenesis: deregulation of embryonic neural crest development. *Cell Tissue Res* 372, 245-262. 10.1007/s00441-017-2747-0.
